# Supplementary material for: Construction of an S-scheme Bi2S3/CdIn2S4 heterojunction for the photocatalytic generation of methyl formate
Source: Royal Society of Chemistry journal article supplement (doi:10.1039/d3nj03111j), 2023-01-01
Supplement: d3nj03111j1.pdf [file d3nj03111j1.pdf]

## Electronic Supporting Information

### **Construction of S-scheme Bi<sub>2</sub>S<sub>3</sub>/CdIn<sub>2</sub>S<sub>4</sub> heterojunction for the photocatalytic generation of methyl formate**

**Lipeng Sun, Wenting Wu, Ruiping Wei, Lijing Gao, Jin Zhang, Guoming Xiao\* and**

**Xiaomei Pan\***

School of Chemistry and Chemical Engineering, Southeast University, Nanjing 211189, China

\*Corresponding authors

E-mail: xiaogm426@gmail.com (Prof. Guomin Xiao)

## 1. Preparation of working electrode

The production process of the working electrode is as follows: the FTO conductive glass was subjected to a 30-minute water treatment to eliminate surface impurities, followed by drying in a vacuum drying oven at 80 °C. Subsequently, the prepared catalyst (5 mg) was dissolved in a mixture of naphthol (50  $\mu$ L) and anhydrous ethanol (950  $\mu$ L). After 20 minutes of ultrasonic dispersion, a solution of 100  $\mu$ L was carefully dripped onto the FTO conductive glass in a repetitive manner, ensuring that the coating area remained within 1 cm<sup>2</sup>. The electrode was ultimately obtained through vacuum drying at 80°C for a duration of 12 hours.

**Table S1.** Comparison of the  $S_{\text{BET}}$ , pore volume ( $V_p$ ) and average pore size ( $d_p$ ) for diverse samples.

| Samples                                                          | $S_{\text{BET}}$ (m <sup>2</sup> /g) | $V_p$ (cm <sup>3</sup> /g) | $d_p$ (nm) |
|------------------------------------------------------------------|--------------------------------------|----------------------------|------------|
| Bi <sub>2</sub> S <sub>3</sub>                                   | 16.26                                | 0.041                      | 10.08      |
| CdIn <sub>2</sub> S <sub>4</sub>                                 | 41.98                                | 0.147                      | 14.02      |
| Bi <sub>2</sub> S <sub>3</sub> /CdIn <sub>2</sub> S <sub>4</sub> | 30.39                                | 0.185                      | 24.41      |

**Table S2.** The photocatalytic conversion rate of Bi<sub>2</sub>S<sub>3</sub>, CdIn<sub>2</sub>S<sub>4</sub> and Bi<sub>2</sub>S<sub>3</sub>/CdIn<sub>2</sub>S<sub>4</sub> to MF under different conditions in methanol.<sup>a</sup>

| Samples                                                          | visible light <sup>b</sup> | simulated sunlight <sup>b</sup> |                 |
|------------------------------------------------------------------|----------------------------|---------------------------------|-----------------|
|                                                                  | CO <sub>2</sub>            | N <sub>2</sub>                  | CO <sub>2</sub> |
| Bi <sub>2</sub> S <sub>3</sub>                                   | 63                         | 25                              | 186             |
| CdIn <sub>2</sub> S <sub>4</sub>                                 | 1561                       | 2154                            | 3250            |
| Bi <sub>2</sub> S <sub>3</sub> /CdIn <sub>2</sub> S <sub>4</sub> | 1956                       | 2365                            | 5464            |

<sup>a</sup> Reaction condition was described in Photocatalytic activity measurement.

<sup>b</sup> The unit of the generation rate was  $\mu\text{mol}\cdot\text{h}^{-1}\cdot\text{g}^{-1}$ .

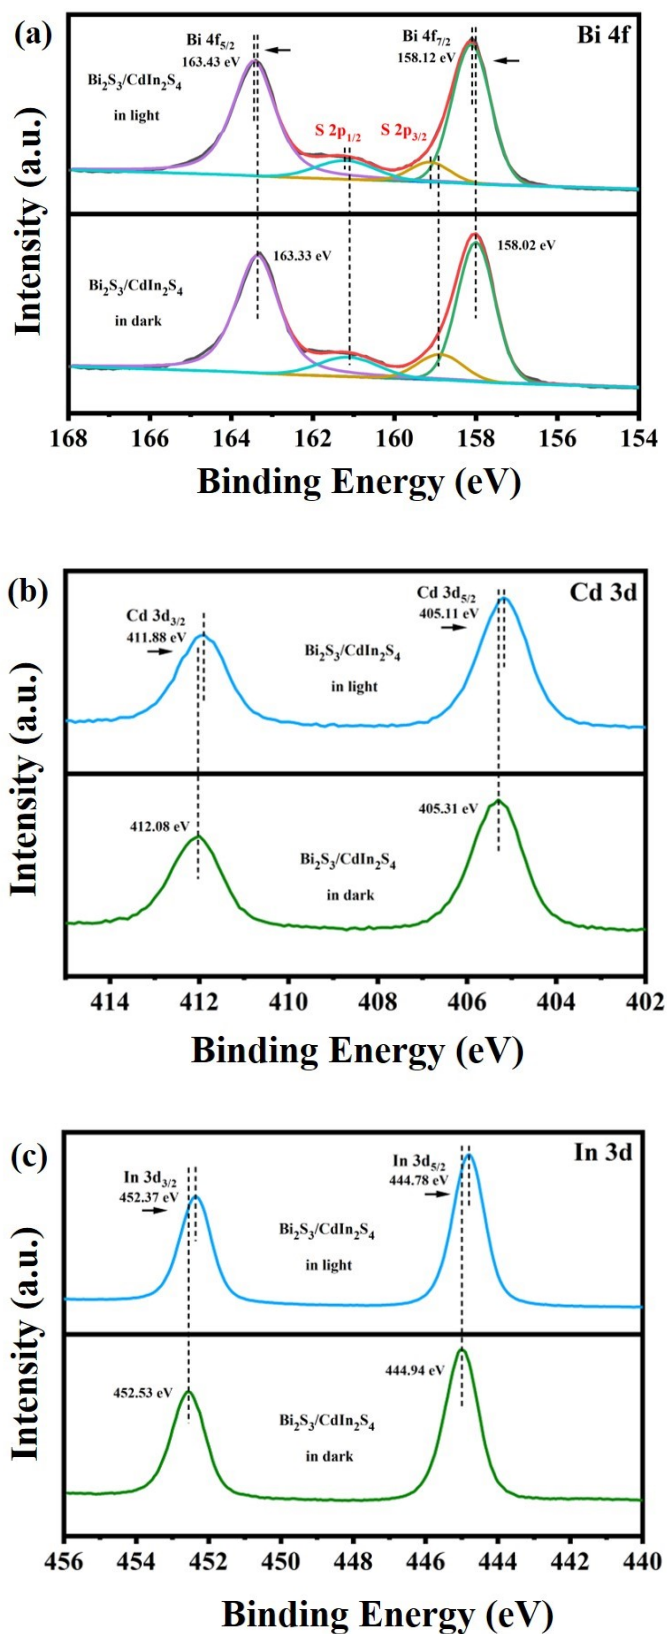

**Fig. S1.** XPS spectra of  $\text{Bi}_2\text{S}_3/\text{CdIn}_2\text{S}_4$  in dark or in light; (a) Bi 4f peaks; (b) Cd 3d peaks; (c) In 3d peaks.

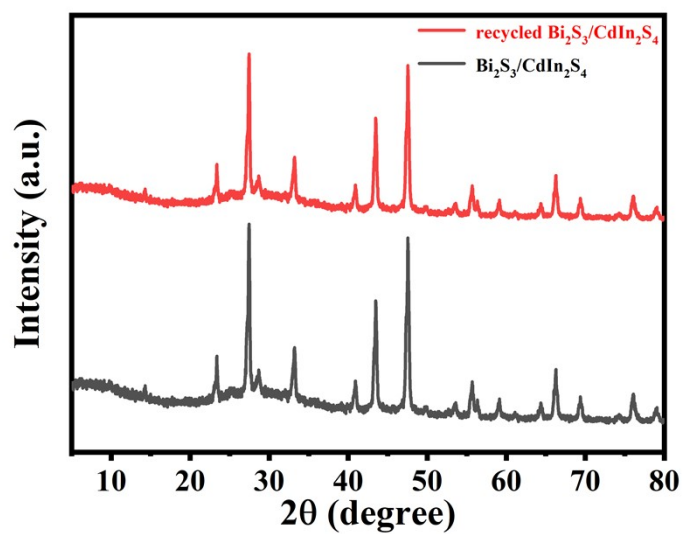

Fig. S2. XRD of recycled  $\text{Bi}_2\text{S}_3/\text{CdIn}_2\text{S}_4$ .

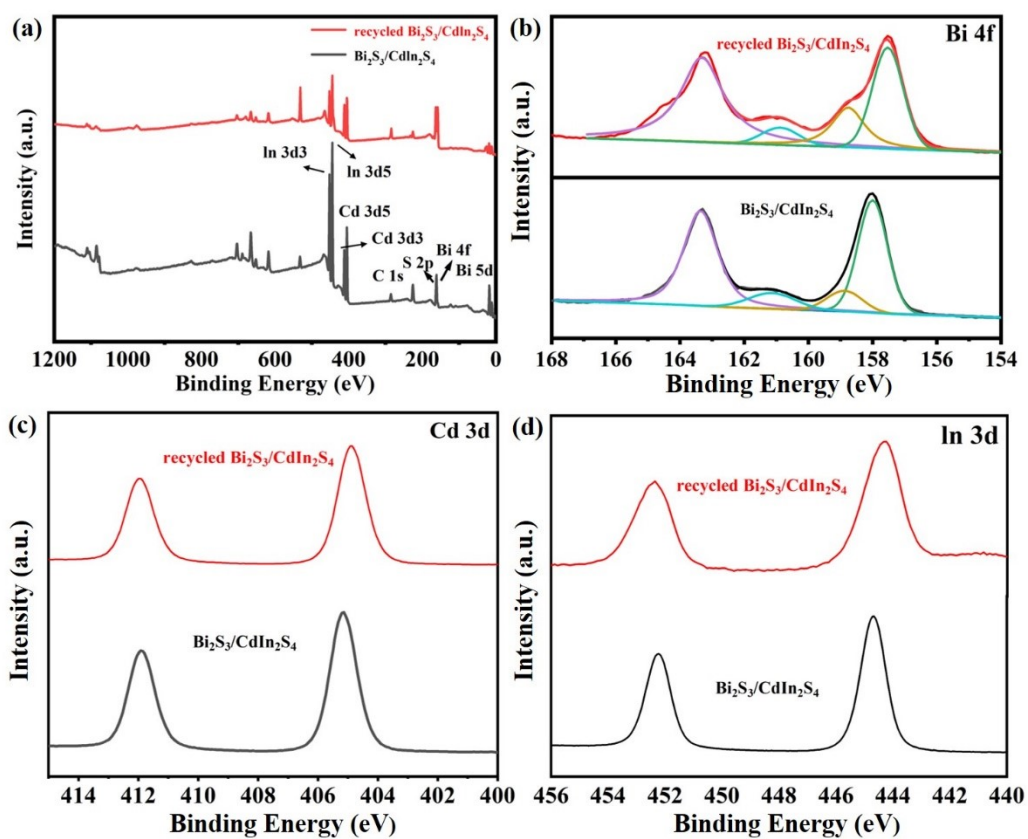

Fig. S3. XPS spectra of  $\text{Bi}_2\text{S}_3/\text{CdIn}_2\text{S}_4$  before and after cyclic reactions.

**Table S3.** Comparison of the reaction conditions and photocatalytic activity with other catalysts for CO<sub>2</sub>/methanol reduction to MF.

| Photocatalysts                                                           | Light sources                                                | Reaction conditions/                                               | Main Product | Photocatalytic efficiencies                  | Ref.      |
|--------------------------------------------------------------------------|--------------------------------------------------------------|--------------------------------------------------------------------|--------------|----------------------------------------------|-----------|
| Bi <sub>2</sub> S <sub>3</sub> /CdIn <sub>2</sub> S <sub>4</sub>         | 350 W Xe lamp (λ > 200 nm)                                   | 25 °C, Liquid-solid, CO <sub>2</sub> , methanol                    | MF           | 5464 μmol g <sup>-1</sup> h <sup>-1</sup>    | This work |
| Bi <sub>2</sub> S <sub>3</sub> microspheres                              | 250 W high pressure mercury lamp (UV-vis light)              | 25 °C, Liquid-solid, CO <sub>2</sub> , methanol                    | MF           | 175 μmol g <sup>-1</sup> h <sup>-1</sup>     | 1         |
| CdIn <sub>2</sub> S <sub>4</sub> (from thioacetamide)                    | 250 W high pressure mercury lamp (UV-vis light) (λ > 365 nm) | 25 °C, Liquid-solid, CO <sub>2</sub> , methanol                    | MF           | 3604 μmol g <sup>-1</sup> h <sup>-1</sup>    | 2         |
| Bi <sub>2</sub> S <sub>3</sub> -ZnIn <sub>2</sub> S <sub>4</sub> (2 wt%) | 250 W high-pressure mercury lamp (UV-vis light)              | 25 °C, Liquid-solid, CO <sub>2</sub> , methanol                    | MF           | 299.43 μmol g <sup>-1</sup> h <sup>-1</sup>  | 3         |
| 0.5 wt% Pd/TiO <sub>2</sub>                                              | 300 W Xe lamp (UV light)                                     | 25 °C, Liquid-solid, CO <sub>2</sub> , methanol                    | MF           | 1367.22 μmol g <sup>-1</sup> h <sup>-1</sup> | 4         |
| hexagonal ZnIn <sub>2</sub> S <sub>4</sub>                               | 250 W high pressure mercury lamp (λ > 365 nm)                | 25 °C, Liquid-solid, CO <sub>2</sub> , methanol                    | MF           | 762.36 μmol g <sup>-1</sup> h <sup>-1</sup>  | 5         |
| 0.3 % Ni/ZnS                                                             | 250 W high pressure mercury lamp (λ > 365 nm)                | 25 °C, Liquid-solid, CO <sub>2</sub> , methanol                    | MF           | 121.4 μmol g <sup>-1</sup> h <sup>-1</sup>   | 6         |
| TiO <sub>2</sub> /NCC-EDA(54 g L <sup>-1</sup> )                         | 300 W Xenon light with UV cut-off filter (λ > 420 nm)        | Room temperature, Liquid-solid, CO <sub>2</sub> , H <sub>2</sub> O | MF           | 62.14 μmol g <sup>-1</sup> h <sup>-1</sup>   | 7         |
| MXene/GO/PDI                                                             | 350 W Xe lamp (λ > 200 nm)                                   | 25 °C, Liquid-solid, CO <sub>2</sub> , methanol                    | MF           | 771.1 μmol g <sup>-1</sup> h <sup>-1</sup>   | 8         |
| CuO/TiO <sub>2</sub> (A B)                                               | 250 W Hg lamp (λ > 365 nm)                                   | 25 °C, Liquid-solid, CO <sub>2</sub> , methanol                    | MF           | 450 μmol g <sup>-1</sup> h <sup>-1</sup>     | 9         |

## Reference

1. J. Chen, S. Qin, G. Song, T. Xiang, F. Xin and X. Yin, *Dalton Trans.*, 2013, **42**, 15133-15138.
2. W. Jiang, X. Yin, F. Xin, Y. Bi, Y. Liu and X. Li, *Appl. Surf. Sci.*, 2014, **288**, 138-142.
3. J. Chen, F. Xin, H. Niu, C.-J. Mao and J.-M. Song, *Mater. Lett.*, 2017, **198**, 1-3.
4. B. Wang, S. Zhong, S. Tang, H. Yue, K. Ma, C. Liu and B. Liang, *Ind. Eng. Chem. Res.*, 2021, **60**, 9684-9695.
5. J. Chen, F. Xin, X. Yin, T. Xiang and Y. Wang, *RSC Adv.*, 2015, **5**, 3833-3839.
6. J. Chen, F. Xin, S. Qin and X. Yin, *Chem. Eng. J.*, 2013, **230**, 506-512.
7. H. Maimaiti, A. Awati, G. Yisilamu, D. Zhang and S. Wang, *Appl. Surf. Sci.*, 2019, **466**, 535-544.
8. W. Wu, H. Bi, Z. Zhang, L. Sun, R. Wei, L. Gao, X. Pan, J. Zhang and G. Xiao, *Colloid Surface A*, 2023, **657**, 130486.
9. Y. Zhao, J. Chen, W. Cai, Y. Bu, Q. Huang, T. Tao and J. Lu, *Chem. Phys. Lett.*, 2019, **725**, 66-74.
